# Supplementary material for: The Interplay of Sirtuin-1, LDL-Cholesterol, and HDL Function: A Randomized Controlled Trial Comparing the Effects of Energy Restriction and Atorvastatin on Women with Premature Coronary Artery Disease
Source: MDPI journal article supplement (doi:10.3390/antiox11122363), 2022-11-29
Supplement: s1 [file s1]

### **Supplementary tables**

**Table S1.** Effects of interventions and variables' changes on risk factors and serum sirtuin-1 (full model).

**Table S2.** HDL particle's lipid composition and cholesterol transfer (full model).

**Table S3.** HDL particle's antioxidant capacity (full model).

**Table S1.** Effects of interventions and variables' changes on risk factors and serum sirtuin-1 (full model).

| Variables                  | R <sup>2</sup> | Full Model |                    |         |              |
|----------------------------|----------------|------------|--------------------|---------|--------------|
|                            |                | $\beta$    | 95% CI for $\beta$ |         | p-value      |
|                            |                |            | Lower              | Upper   |              |
| <i>Serum sirtuin-1</i>     | 0.341          |            |                    |         |              |
| Constant                   |                | -29.798    | -86.330            | 26.735  | 0.289        |
| BMI, kg/m <sup>2</sup>     |                | 34.537     | -5.073             | 74.147  | 0.085        |
| Serum HDL-c, mg/dL         |                | -1.084     | -6.795             | 4.628   | 0.701        |
| Serum LDL-c, mg/dL         |                | 0.133      | -0.682             | 0.948   | 0.741        |
| Serum triglycerides, mg/dL |                | 0.139      | -0.419             | 0.697   | 0.613        |
| Serum glucose, mg/dL       |                | 2.166      | 0.070              | 4.262   | <b>0.043</b> |
| Energy restriction         |                | 63.882     | -22.267            | 150.031 | 0.140        |
| Atorvastatin               |                | 3.920      | -93.872            | 101.712 | 0.935        |
| <i>Serum LDL-c</i>         | 0.428          |            |                    |         |              |
| Constant                   |                | 1.999      | -25.338            | 29.335  | 0.882        |
| Serum sirtuin-1, pg/mL     |                | 0.030      | -0.153             | 0.213   | 0.741        |
| BMI, kg/m <sup>2</sup>     |                | -7.612     | -27.207            | 11.982  | 0.433        |
| Serum HDL-c, mg/dL         |                | -0.035     | -2.750             | 2.679   | 0.979        |
| Serum triglycerides, mg/dL |                | 0.193      | -0.062             | 0.448   | 0.133        |
| Serum glucose, mg/dL       |                | 0.034      | -1.036             | 1.104   | 0.949        |
| Energy restriction         |                | -24.570    | -65.973            | 16.834  | 0.234        |
| Atorvastatin               |                | -53.835    | -95.244            | -12.427 | <b>0.013</b> |
| <i>Serum HDL-c</i>         | 0.290          |            |                    |         |              |
| Constant                   |                | -1.232     | -5.102             | 2.639   | 0.520        |
| Serum sirtuin-1, pg/mL     |                | -0.005     | -0.031             | 0.021   | 0.701        |
| BMI, kg/m <sup>2</sup>     |                | 0.286      | -2.538             | 3.109   | 0.837        |
| Serum LDL-c, mg/dL         |                | -0.001     | -0.056             | 0.054   | 0.979        |
| Serum triglycerides, mg/dL |                | -0.036     | -0.071             | -0.001  | <b>0.045</b> |
| Serum glucose, mg/dL       |                | 0.104      | -0.043             | 0.251   | 0.158        |
| Energy restriction         |                | -1.873     | -7.888             | 4.142   | 0.529        |
| Atorvastatin               |                | 1.557      | -5.027             | 8.140   | 0.632        |
| <i>Serum triglycerides</i> | 0.450          |            |                    |         |              |
| Constant                   |                | 24.572     | -14.100            | 63.245  | 0.204        |
| Serum sirtuin-1, pg/mL     |                | 0.066      | -0.200             | 0.332   | 0.613        |
| BMI, kg/m <sup>2</sup>     |                | 1.829      | -27.019            | 30.676  | 0.898        |
| Serum HDL-c, mg/dL         |                | -3.757     | -7.433             | -0.082  | <b>0.045</b> |
| Serum LDL-c, mg/dL         |                | 0.409      | -0.132             | 0.950   | 0.133        |
| Serum glucose, mg/dL       |                | 0.315      | -1.239             | 1.869   | 0.681        |
| Energy restriction         |                | -49.066    | -107.944           | 9.812   | 0.099        |
| Atorvastatin               |                | -37.427    | -103.363           | 28.509  | 0.255        |
| <i>Serum glucose</i>       | 0.242          |            |                    |         |              |
| Constant                   |                | 1.778      | -8.090             | 11.646  | 0.715        |
| Serum sirtuin-1, pg/mL     |                | 0.064      | 0.002              | 0.125   | <b>0.043</b> |
| BMI, kg/m <sup>2</sup>     |                | -0.497     | -7.662             | 6.668   | 0.888        |
| Serum HDL-c, mg/dL         |                | 0.671      | -0.276             | 1.618   | 0.158        |
| Serum LDL-c, mg/dL         |                | 0.004      | -0.136             | 0.144   | 0.949        |
| Serum triglycerides, mg/dL |                | 0.019      | -0.076             | 0.115   | 0.681        |
| Energy restriction         |                | -1.455     | -16.811            | 13.901  | 0.847        |
| Atorvastatin               |                | -4.664     | -21.334            | 12.007  | 0.571        |
| <i>BMI</i>                 | 0.321          |            |                    |         |              |
| Constant                   |                | 0.530      | 0.037              | 1.023   | <b>0.036</b> |
| Serum sirtuin-1, pg/mL     |                | 0.003      | 0.000              | 0.006   | 0.085        |
| Serum HDL-c, mg/dL         |                | 0.005      | -0.048             | 0.058   | 0.837        |
| Serum LDL-c, mg/dL         |                | -0.003     | -0.010             | 0.005   | 0.433        |
| Serum triglycerides, mg/dL |                | 0.000      | -0.005             | 0.006   | 0.898        |
| Serum glucose, mg/dL       |                | -0.001     | -0.022             | 0.019   | 0.888        |
| Energy restriction         |                | -1.046     | -1.770             | -0.321  | <b>0.006</b> |
| Atorvastatin               |                | -0.586     | -1.463             | 0.291   | 0.182        |

**Table S2.** HDL particle's lipid composition and cholesterol transfer (full model).

| Variables                                    | R <sup>2</sup> | Full Model |              |        |              |
|----------------------------------------------|----------------|------------|--------------|--------|--------------|
|                                              |                | β          | 95% CI for β |        | p-value      |
|                                              |                |            | Lower        | Upper  |              |
| <i>Esterified cholesterol transfer</i>       | 0.381          |            |              |        |              |
| Constant                                     |                | -0.084     | -0.517       | 0.349  | 0.694        |
| Serum sirtuin-1, pg/mL                       |                | 0.001      | -0.002       | 0.004  | 0.581        |
| BMI, kg/m <sup>2</sup>                       |                | 0.067      | -0.246       | 0.381  | 0.663        |
| Serum HDL-c, mg/dL                           |                | 0.042      | -0.001       | 0.085  | 0.056        |
| Serum LDL-c, mg/dL                           |                | 0.002      | -0.005       | 0.008  | 0.599        |
| Serum triglycerides, mg/dL                   |                | 0.005      | 0.001        | 0.009  | <b>0.017</b> |
| Serum glucose, mg/dL                         |                | -0.002     | -0.019       | 0.015  | 0.844        |
| Energy restriction                           |                | -0.180     | -0.852       | 0.493  | 0.588        |
| Atorvastatin                                 |                | 0.061      | -0.673       | 0.794  | 0.867        |
| <i>Free cholesterol transfer</i>             | 0.315          |            |              |        |              |
| Constant                                     |                | 0.055      | -0.642       | 0.751  | 0.873        |
| Serum sirtuin-1, pg/mL                       |                | 0.001      | -0.003       | 0.006  | 0.558        |
| BMI, kg/m <sup>2</sup>                       |                | 0.122      | -0.383       | 0.627  | 0.623        |
| Serum HDL-c, mg/dL                           |                | 0.071      | 0.002        | 0.140  | <b>0.045</b> |
| Serum LDL-c, mg/dL                           |                | 0.000      | -0.010       | 0.010  | 0.967        |
| Serum triglycerides, mg/dL                   |                | 0.006      | -0.001       | 0.012  | 0.095        |
| Serum glucose, mg/dL                         |                | 0.003      | -0.024       | 0.030  | 0.818        |
| Energy restriction                           |                | -0.402     | -1.484       | 0.681  | 0.453        |
| Atorvastatin                                 |                | -0.090     | -1.271       | 1.091  | 0.877        |
| <i>HDL particle's free cholesterol</i>       | 0.236          |            |              |        |              |
| Constant                                     |                | -0.607     | -1.805       | 0.591  | 0.308        |
| Serum sirtuin-1, pg/mL                       |                | -0.001     | -0.009       | 0.007  | 0.827        |
| BMI, kg/m <sup>2</sup>                       |                | 0.921      | 0.053        | 1.789  | <b>0.038</b> |
| Serum HDL-c, mg/dL                           |                | -0.082     | -0.201       | 0.037  | 0.169        |
| Serum LDL-c, mg/dL                           |                | 0.008      | -0.009       | 0.025  | 0.317        |
| Serum triglycerides, mg/dL                   |                | -0.005     | -0.017       | 0.006  | 0.348        |
| Serum glucose, mg/dL                         |                | -0.003     | -0.050       | 0.044  | 0.901        |
| Energy restriction                           |                | 1.378      | -0.483       | 3.239  | 0.140        |
| Atorvastatin                                 |                | 1.051      | -0.979       | 3.082  | 0.298        |
| <i>HDL particle's esterified cholesterol</i> | 0.217          |            |              |        |              |
| Constant                                     |                | 0.569      | -14.059      | 15.198 | 0.937        |
| Serum sirtuin-1, pg/mL                       |                | 0.071      | -0.027       | 0.170  | 0.147        |
| BMI, kg/m <sup>2</sup>                       |                | -9.366     | -19.966      | 1.233  | 0.081        |
| Serum HDL-c, mg/dL                           |                | 0.266      | -1.186       | 1.718  | 0.710        |
| Serum LDL-c, mg/dL                           |                | -0.075     | -0.282       | 0.132  | 0.464        |
| Serum triglycerides, mg/dL                   |                | -0.039     | -0.181       | 0.103  | 0.579        |
| Serum glucose, mg/dL                         |                | 0.157      | -0.415       | 0.729  | 0.578        |
| Energy restriction                           |                | -5.612     | -28.336      | 17.112 | 0.616        |
| Atorvastatin                                 |                | -4.196     | -28.993      | 20.601 | 0.731        |
| <i>HDL particle's phospholipids</i>          | 0.254          |            |              |        |              |
| Constant                                     |                | -1.165     | -13.526      | 11.195 | 0.848        |
| Serum sirtuin-1, pg/mL                       |                | -0.078     | -0.161       | 0.005  | 0.065        |

|                                     |        |         |        |       |
|-------------------------------------|--------|---------|--------|-------|
| BMI, kg/m <sup>2</sup>              | 8.057  | -0.899  | 17.013 | 0.076 |
| Serum HDL-c, mg/dL                  | -0.254 | -1.481  | 0.973  | 0.674 |
| Serum LDL-c, mg/dL                  | 0.064  | -0.111  | 0.239  | 0.462 |
| Serum triglycerides, mg/dL          | 0.029  | -0.091  | 0.149  | 0.621 |
| Serum glucose, mg/dL                | -0.111 | -0.595  | 0.373  | 0.642 |
| Energy restriction                  | 3.311  | -15.890 | 22.513 | 0.726 |
| Atorvastatin                        | 3.228  | -17.725 | 24.180 | 0.754 |
| <i>HDL particle's triglycerides</i> | 0.087  |         |        |       |
| Constant                            | 1.206  | -2.376  | 4.788  | 0.496 |
| Serum sirtuin-1, pg/mL              | 0.008  | -0.016  | 0.032  | 0.511 |
| BMI, kg/m <sup>2</sup>              | 0.379  | -2.216  | 2.974  | 0.767 |
| Serum HDL-c, mg/dL                  | 0.067  | -0.288  | 0.423  | 0.700 |
| Serum LDL-c, mg/dL                  | 0.003  | -0.048  | 0.053  | 0.912 |
| Serum triglycerides, mg/dL          | 0.015  | -0.020  | 0.050  | 0.387 |
| Serum glucose, mg/dL                | -0.044 | -0.184  | 0.096  | 0.527 |
| Energy restriction                  | 0.970  | -4.594  | 6.534  | 0.723 |
| Atorvastatin                        | -0.060 | -6.131  | 6.012  | 0.984 |

**Table S3.** HDL particle's antioxidant capacity (full model).

| Full Model                 |                |        |              |        |         |
|----------------------------|----------------|--------|--------------|--------|---------|
| Variables                  | R <sup>2</sup> | β      | 95% CI for β |        | p-value |
|                            |                |        | Lower        | Upper  |         |
| <i>VMax</i>                | 0.304          |        |              |        |         |
| Constant                   |                | 0.075  | -0.070       | 0.221  | 0.294   |
| Serum sirtuin-1, pg/mL     |                | 0.000  | -0.001       | 0.001  | 0.615   |
| BMI, kg/m <sup>2</sup>     |                | 0.052  | -0.102       | 0.205  | 0.492   |
| Serum HDL-c, mg/dL         |                | 0.011  | -0.005       | 0.026  | 0.175   |
| Serum LDL-c, mg/dL         |                | 0.002  | 0.000        | 0.004  | 0.060   |
| Serum triglycerides, mg/dL |                | 0.000  | -0.002       | 0.001  | 0.596   |
| Serum glucose, mg/dL       |                | -0.001 | -0.007       | 0.005  | 0.689   |
| Energy restriction         |                | -0.006 | -0.218       | 0.207  | 0.955   |
| Atorvastatin               |                | 0.013  | -0.205       | 0.232  | 0.899   |
| <i>TMax</i>                | 0.227          |        |              |        |         |
| Constant                   |                | 4.135  | -7.206       | 15.476 | 0.457   |
| Serum sirtuin-1, pg/mL     |                | -0.002 | -0.080       | 0.075  | 0.955   |
| BMI, kg/m <sup>2</sup>     |                | 5.420  | -6.543       | 17.383 | 0.357   |
| Serum HDL-c, mg/dL         |                | 0.358  | -0.874       | 1.590  | 0.553   |
| Serum LDL-c, mg/dL         |                | 0.170  | -0.002       | 0.341  | 0.053   |
| Serum triglycerides, mg/dL |                | -0.041 | -0.151       | 0.068  | 0.444   |
| Serum glucose, mg/dL       |                | -0.010 | -0.476       | 0.456  | 0.964   |
| Energy restriction         |                | 4.289  | -12.303      | 20.880 | 0.597   |
| Atorvastatin               |                | 4.374  | -12.692      | 21.440 | 0.600   |
| <i>Optic density peak</i>  | 0.244          |        |              |        |         |
| Constant                   |                | 0.017  | -0.026       | 0.059  | 0.425   |
| Serum sirtuin-1, pg/mL     |                | 0.000  | 0.000        | 0.000  | 0.950   |
| BMI, kg/m <sup>2</sup>     |                | 0.008  | -0.037       | 0.053  | 0.714   |
| Serum HDL-c, mg/dL         |                | 0.002  | -0.003       | 0.007  | 0.401   |
| Serum LDL-c, mg/dL         |                | 0.001  | 0.000        | 0.001  | 0.054   |
| Serum triglycerides, mg/dL |                | 0.000  | 0.000        | 0.000  | 0.714   |
| Serum glucose, mg/dL       |                | 0.000  | -0.001       | 0.002  | 0.665   |

|                             |         |          |          |       |
|-----------------------------|---------|----------|----------|-------|
| Energy restriction          | 0.004   | -0.058   | 0.067    | 0.885 |
| Atorvastatin                | 0.014   | -0.050   | 0.078    | 0.648 |
| <i>Area under the curve</i> | 0.174   |          |          |       |
| Constant                    | 215.151 | -421.240 | 851.542  | 0.490 |
| Serum sirtuin-1, pg/mL      | 0.205   | -4.145   | 4.555    | 0.923 |
| BMI, kg/m <sup>2</sup>      | 18.952  | -652.315 | 690.220  | 0.954 |
| Serum HDL-c, mg/dL          | 20.817  | -48.320  | 89.955   | 0.538 |
| Serum LDL-c, mg/dL          | 6.981   | -2.657   | 16.619   | 0.147 |
| Serum triglycerides, mg/dL  | -0.285  | -6.430   | 5.860    | 0.924 |
| Serum glucose, mg/dL        | 5.801   | -20.341  | 31.942   | 0.649 |
| Energy restriction          | -52.767 | -983.762 | 878.228  | 0.907 |
| Atorvastatin                | 169.693 | -787.922 | 1127.309 | 0.716 |
